# Supplementary material for: A Novel Transposon Tn7709 Harbors Multidrug Resistance Genes in a Pathogenic Aeromonas media Strain QST31
Source: MDPI journal article supplement (doi:10.3390/microorganisms12030572), 2024-03-13
Supplement: s1 [file s1]

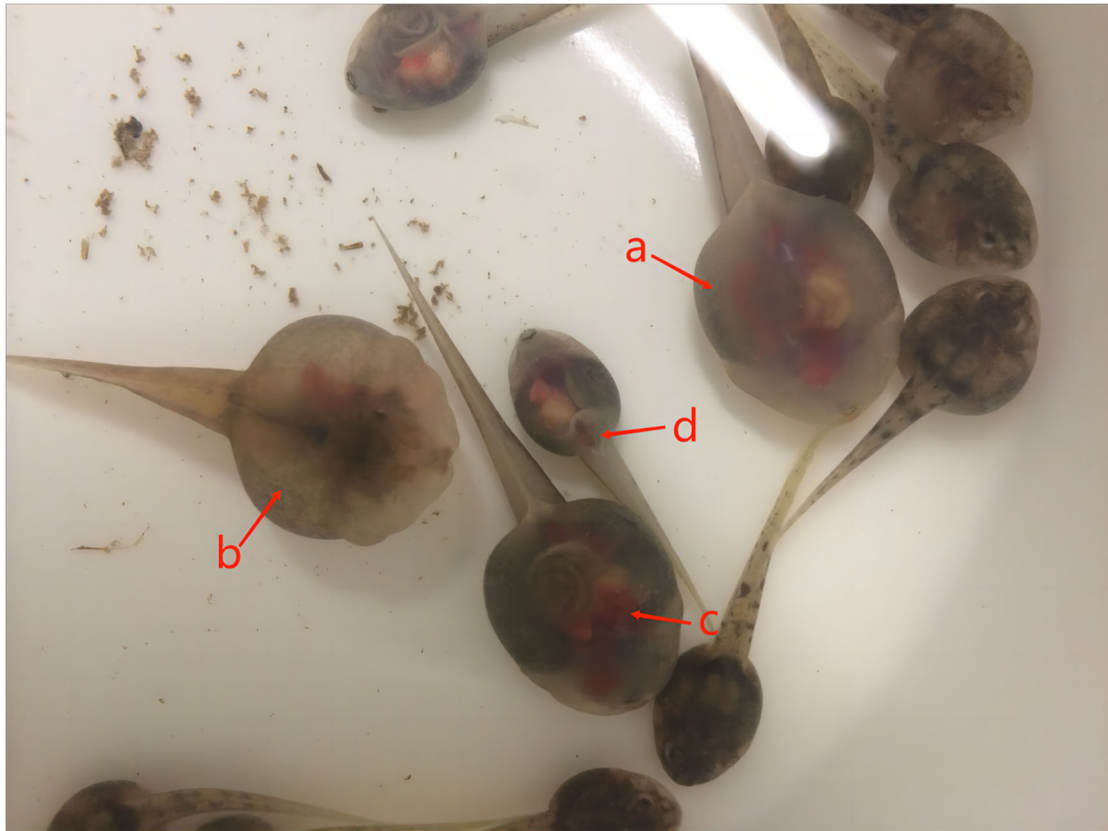

**Figure S1.** Clinical signs of the naturally diseased tadpoles. a and b, swollen abdomen with ascites; c, hemorrhage in the body cavity; d, anal dilatation with hyperemia.

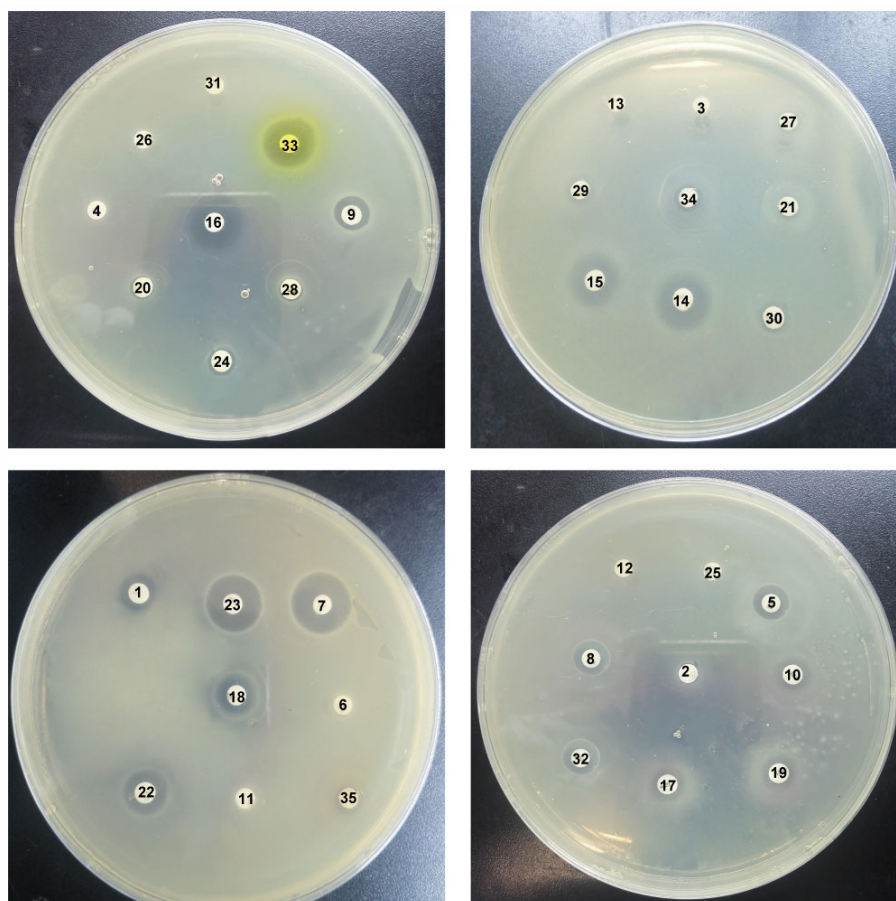

**Figure S2.**

Multidrug resistance phenotype of strain QST31 based on the Kirby-Bauer disk diffusion assay. The numbers in this figure are corresponding to the numbers in Table 2.

**Table S1****Primers of the 16S rRNA and *gyrB* genes for PCR amplification**

| <b>Genes</b> | <b>Primer<br/>Name</b> | <b>Primer Sequence (5'-3')</b> | <b>Annealing<br/>Temperature (°C)</b> | <b>Product<br/>Size (bp)</b> |
|--------------|------------------------|--------------------------------|---------------------------------------|------------------------------|
| 16s rRNA     | 27f                    | AGAGTTTGATCATGGCTCAG           | 54                                    | 1500                         |
|              | 1492r                  | GGTTACCTTGTTACGACTT            |                                       |                              |
| <i>gyrB</i>  | gyrB-3F                | TCCGGCGGTCTGCACGGCGT           | 55                                    | 1200                         |
|              | gyrB-14R               | TTGTCCGGGTTGTACTCGTC           |                                       |                              |

**Table S2.**

Predicted antimicrobial resistance genes (cut off with loose and best identifies >50) in the genome of the QST31 strain

| <b>ARO<br/>Aame</b> | <b>ARO<br/>Accession</b> | <b>Position</b>     | <b>Orientation</b> | <b>AMR Gene Family</b>                                                 | <b>Drug Class</b>                                                                         | <b>Resistance Mechanism</b>  |
|---------------------|--------------------------|---------------------|--------------------|------------------------------------------------------------------------|-------------------------------------------------------------------------------------------|------------------------------|
| <i>rsmA</i>         | 3005069                  | 510,948-511,136     | +                  | resistance-nodulation-cell<br>division (RND) antibiotic<br>efflux pump | fluoroquinolone<br>antibiotic;<br>diaminopyrimidine<br>antibiotic; phenicol<br>antibiotic | antibiotic efflux            |
| <i>CRP</i>          | 3000518                  | 3,608,993-3,609,631 | +                  | resistance-nodulation-cell<br>division (RND) antibiotic<br>efflux pump | macrolide antibiotic;<br>fluoroquinolone<br>antibiotic; penam                             | antibiotic efflux            |
| <i>UhpT</i>         | 3003890                  | 1,440,943-1,442,349 | -                  | antibiotic-resistant UhpT                                              | phosphonic acid<br>antibiotic                                                             | antibiotic target alteration |
| <i>gyrA</i>         | 3003294                  | 2,385,405-2,388,194 | -                  | fluoroquinolone resistant<br>gyrA                                      | fluoroquinolone<br>antibiotic                                                             | antibiotic target alteration |
| <i>bacA</i>         | 3002986                  | 4,415,200-4,416,015 | +                  | undecaprenyl<br>pyrophosphate related<br>proteins                      | peptide antibiotic                                                                        | antibiotic target alteration |
| <i>mcr-7.1</i>      | 3004517                  | 3,142,787-3,144,412 | -                  | MCR<br>phosphoethanolamine<br>transferase                              | peptide antibiotic                                                                        | antibiotic target alteration |
| <i>parC</i>         | 3003308                  | 466,816-469,107     | +                  | fluoroquinolone resistant<br>parC                                      | fluoroquinolone<br>antibiotic                                                             | antibiotic target alteration |
| <i>yojI</i>         | 3003952                  | 11,873-13,519       | -                  | ATP-binding cassette<br>(ABC) antibiotic efflux                        | peptide antibiotic                                                                        | antibiotic efflux            |

|              |         |                     |   |                                                                        |                                                                                                                                                                                                                              |                               |
|--------------|---------|---------------------|---|------------------------------------------------------------------------|------------------------------------------------------------------------------------------------------------------------------------------------------------------------------------------------------------------------------|-------------------------------|
| <i>katG</i>  | 3003392 | 2,017,477-2,019,651 | - | pump<br>isoniazid resistant katG                                       | isoniazid-like antibiotic                                                                                                                                                                                                    | antibiotic target alteration  |
| <i>rosa</i>  | 3003048 | 4,548,728-4,549,948 | + | major facilitator<br>superfamily (MFS)<br>antibiotic efflux pump       | peptide antibiotic                                                                                                                                                                                                           | antibiotic efflux             |
| <i>msbA</i>  | 3003950 | 1,702,361-1,704,130 | + | ATP-binding cassette<br>(ABC) antibiotic efflux<br>pump                | nitroimidazole antibiotic                                                                                                                                                                                                    | antibiotic efflux             |
| <i>dfrA3</i> | 3003105 | 1,057,200-1,057,694 | + | trimethoprim resistant<br>dihydrofolate reductase dfr                  | diaminopyrimidine<br>antibiotic                                                                                                                                                                                              | antibiotic target replacement |
| <i>fusA</i>  | 3003735 | 4,322,184-4,324,289 | - | antibiotic resistant fusA                                              | fusidane antibiotic                                                                                                                                                                                                          | antibiotic target alteration  |
| <i>gyrB</i>  | 3004562 | 4,600,326-4,602,737 | - | fluoroquinolone resistant<br>gyrB                                      | fluoroquinolone<br>antibiotic                                                                                                                                                                                                | antibiotic target alteration  |
| <i>mdtH</i>  | 3001216 | 906,007-907,200     | - | major facilitator<br>superfamily (MFS)<br>antibiotic efflux pump       | fluoroquinolone<br>antibiotic                                                                                                                                                                                                | antibiotic efflux             |
| <i>oprM</i>  | 3000379 | 1,558,373-1,559,791 | + | resistance-nodulation-cell<br>division (RND) antibiotic<br>efflux pump | macrolide antibiotic;<br>fluoroquinolone<br>antibiotic; monobactam;<br>aminoglycoside<br>antibiotic; carbapenem;<br>cephalosporin;<br>cephamycin; penam;<br>tetracycline antibiotic;<br>peptide antibiotic;<br>aminocoumarin | antibiotic efflux             |

|             |         |                     |   |                                                                                                                                             |                                                                                                                                                                                               |                                                                |
|-------------|---------|---------------------|---|---------------------------------------------------------------------------------------------------------------------------------------------|-----------------------------------------------------------------------------------------------------------------------------------------------------------------------------------------------|----------------------------------------------------------------|
|             |         |                     |   |                                                                                                                                             | antibiotic;<br>diaminopyrimidine<br>antibiotic; sulfonamide<br>antibiotic; phenicol<br>antibiotic; penem;<br>disinfecting agents and<br>antiseptics                                           |                                                                |
| <i>rpoB</i> | 3003283 | 4,332,331-4,336,359 | - | rifamycin-resistant<br>beta-subunit of RNA<br>polymerase (rpoB)                                                                             | rifamycin antibiotic                                                                                                                                                                          | antibiotic target alteration;<br>antibiotic target replacement |
| <i>acrA</i> | 3004042 | 1,554,029-1,555,213 | + | resistance-nodulation-cell<br>division (RND) antibiotic<br>efflux pump                                                                      | fluoroquinolone<br>antibiotic; cephalosporin;<br>glycylcycline; penam;<br>tetracycline antibiotic;<br>rifamycin antibiotic;<br>phenicol antibiotic;<br>disinfecting agents and<br>antiseptics | antibiotic efflux                                              |
| <i>H-NS</i> | 3000676 | 2,011,503-2,011,907 | - | major facilitator<br>superfamily (MFS)<br>antibiotic efflux pump;<br>resistance-nodulation-cell<br>division (RND) antibiotic<br>efflux pump | macrolide antibiotic;<br>fluoroquinolone<br>antibiotic; cephalosporin;<br>cephamycin; penam;<br>tetracycline antibiotic                                                                       | antibiotic efflux                                              |
| <i>H-NS</i> | 3000676 | 1,463,249-1,463,656 | + | major facilitator<br>superfamily (MFS)                                                                                                      | macrolide antibiotic;<br>fluoroquinolone                                                                                                                                                      | antibiotic efflux                                              |

|             |         |                     |   |                                                                                                   |                                                                                       |                                                                |
|-------------|---------|---------------------|---|---------------------------------------------------------------------------------------------------|---------------------------------------------------------------------------------------|----------------------------------------------------------------|
|             |         |                     |   | antibiotic efflux pump;<br>resistance-nodulation-cell<br>division (RND) antibiotic<br>efflux pump | antibiotic; cephalosporin;<br>cephamycin; penam;<br>tetracycline antibiotic           |                                                                |
| <i>rpoB</i> | 3007051 | 4,327,936-4,332,240 | - | rifamycin-resistant<br>beta-subunit of RNA<br>polymerase (rpoB)                                   | fluoroquinolone<br>antibiotic; rifamycin<br>antibiotic                                | antibiotic target alteration;<br>antibiotic target replacement |
| <i>ompA</i> | 3005044 | 4,013,749-4,014,780 | + | General Bacterial Porin<br>with reduced permeability<br>to peptide antibiotics                    | peptide antibiotic                                                                    | reduced permeability to<br>antibiotic                          |
| <i>imiS</i> | 3003095 | 795,461-795,619     | + | CphA beta-lactamase                                                                               | carbapenem                                                                            | antibiotic inactivation                                        |
| <i>tetR</i> | 3003479 | 333,224-333,901     | - | major facilitator<br>superfamily (MFS)<br>antibiotic efflux pump                                  | tetracycline antibiotic                                                               | antibiotic target alteration;<br>antibiotic efflux             |
| <i>vatF</i> | 3003744 | 1,085,937-1,086,482 | - | streptogramin vat<br>acetyltransferase                                                            | streptogramin antibiotic;<br>streptogramin A<br>antibiotic                            | antibiotic inactivation                                        |
| <i>murA</i> | 3003776 | 4,157,696-4,158,952 | + | antibiotic-resistant murA<br>transferase                                                          | phosphonic acid<br>antibiotic                                                         | antibiotic target alteration                                   |
| <i>macB</i> | 3000535 | 804,149-806,098     | - | ATP-binding cassette<br>(ABC) antibiotic efflux<br>pump                                           | macrolide antibiotic                                                                  | antibiotic efflux                                              |
| <i>cpxR</i> | 3004054 | 162,336-163,028     | - | resistance-nodulation-cell<br>division (RND) antibiotic<br>efflux pump                            | macrolide antibiotic;<br>fluoroquinolone<br>antibiotic; monobactam;<br>aminoglycoside | antibiotic efflux                                              |

|             |         |                     |   |                                                                                                                                                                                                      |                                                                                                                                                                                                                                                 |                   |
|-------------|---------|---------------------|---|------------------------------------------------------------------------------------------------------------------------------------------------------------------------------------------------------|-------------------------------------------------------------------------------------------------------------------------------------------------------------------------------------------------------------------------------------------------|-------------------|
|             |         |                     |   |                                                                                                                                                                                                      | antibiotic; carbapenem;<br>cephalosporin;<br>cephamycin; penam;<br>tetracycline antibiotic;<br>peptide antibiotic;<br>aminocoumarin<br>antibiotic;<br>diaminopyrimidine<br>antibiotic; sulfonamide<br>antibiotic; phenicol<br>antibiotic; penem |                   |
| <i>golS</i> | 3000504 | 4,504,321-4,504,710 | - | resistance-nodulation-cell<br>division (RND) antibiotic<br>efflux pump                                                                                                                               | monobactam;<br>carbapenem;<br>cephalosporin;<br>cephamycin; penam;<br>phenicol antibiotic;<br>penem                                                                                                                                             | antibiotic efflux |
| <i>tolC</i> | 3000237 | 459,350-460,651     | - | ATP-binding cassette<br>(ABC) antibiotic efflux<br>pump; major facilitator<br>superfamily (MFS)<br>antibiotic efflux pump;<br>resistance-nodulation-cell<br>division (RND) antibiotic<br>efflux pump | macrolide antibiotic;<br>fluoroquinolone<br>antibiotic;<br>aminoglycoside<br>antibiotic; carbapenem;<br>cephalosporin;<br>glycylcycline;<br>cephamycin; penam;<br>tetracycline antibiotic;                                                      | antibiotic efflux |



|                 |         |                     |   |                                                         |                                                                                                                                                       |                   |
|-----------------|---------|---------------------|---|---------------------------------------------------------|-------------------------------------------------------------------------------------------------------------------------------------------------------|-------------------|
|                 |         |                     |   |                                                         | peptide antibiotic;<br>aminocoumarin<br>antibiotic; rifamycin<br>antibiotic; phenicol<br>antibiotic; penem;<br>disinfecting agents and<br>antiseptics |                   |
| <i>tet</i> (35) | 3000481 | 2,012,485-2,014,065 | + | ATP-binding cassette<br>(ABC) antibiotic efflux<br>pump | tetracycline antibiotic                                                                                                                               | antibiotic efflux |

---

**Table S3**

Virulence gene profiles of *Aeromonas media* QST31 strains (light green) and 5 reference strains (dark blue)

| VFclass   | Virulence Factors | Related Genes | <i>A. media</i> QST31 | <i>A. hydrophila</i> ML09-119 | <i>A. hydrophila</i> subsp. <i>hydrophila</i> ATCC 7966 | <i>A. salmonicida</i> subsp. <i>salmonicida</i> A449 |               | <i>A. veronii</i> B565 |
|-----------|-------------------|---------------|-----------------------|-------------------------------|---------------------------------------------------------|------------------------------------------------------|---------------|------------------------|
|           |                   |               | QST31 (QST31)         | Chromosome (NC_021290)        | Chromosome (NC_008570)                                  | Chromosome (NC_009348)                               | 5 (NC_009350) | Chromosome (NC_015424) |
| Adherence | Flp type IV pili  | flp1          | -                     | AHML_08075                    | AHA_1450                                                | ASA_2915                                             | -             | B565_2735              |
|           |                   | flpA          | -                     | AHML_08080                    | AHA_1451                                                | ASA_2914                                             | -             | B565_2734              |
|           |                   | flpB          | -                     | AHML_08085                    | AHA_1452                                                | ASA_2913*                                            | -             | B565_2733              |
|           |                   | flpC          | -                     | AHML_08090                    | AHA_1453                                                | ASA_2912                                             | -             | B565_2732              |
|           |                   | flpD          | -                     | AHML_08095                    | AHA_1454                                                | ASA_2911                                             | -             | B565_2731              |
|           |                   | flpE          | -                     | AHML_08100                    | AHA_1455                                                | ASA_2910                                             | -             | B565_2730              |
|           |                   | flpF          | -                     | AHML_08105                    | AHA_1456                                                | ASA_2909                                             | -             | B565_2729              |
|           |                   | flpG          | -                     | AHML_08110                    | AHA_1457                                                | ASA_2908*                                            | -             | B565_2728              |
|           |                   | flpH          | -                     | AHML_08115                    | AHA_1458                                                | ASA_2907                                             | -             | B565_2727              |

|  |                  |      |   |            |          |           |   |           |
|--|------------------|------|---|------------|----------|-----------|---|-----------|
|  |                  | flpI | - | AHML_08120 | AHA_1459 | ASA_2906* | - | B565_2726 |
|  |                  | flpJ | - | AHML_08125 | AHA_1460 | ASA_2905  | - | B565_2725 |
|  |                  | flpK | - | AHML_08130 | AHA_1461 | ASA_2904  | - | B565_2724 |
|  |                  | flpL | - | AHML_08135 | AHA_1462 | ASA_2903  | - | B565_2723 |
|  | Lateral flagella | flgC | - | -          | -        | ASA_0364  | - | -         |
|  |                  | flgE | - | -          | -        | ASA_0366  | - | -         |
|  |                  | flgI | - | -          | -        | ASA_0370  | - | -         |
|  |                  | flgJ | - | -          | -        | ASA_0371  | - | -         |
|  |                  | fliF | - | -          | -        | ASA_0355  | - | -         |
|  |                  | fliG | - | -          | -        | ASA_0356  | - | -         |
|  |                  | fliP | - | -          | -        | ASA_0348  | - | -         |
|  |                  | lafB | - | -          | -        | ASA_0379  | - | -         |
|  |                  | lafC | - | -          | -        | ASA_0380  | - | -         |
|  |                  | lafE | - | -          | -        | ASA_0382  | - | -         |
|  |                  | lafF | - | -          | -        | ASA_0383  | - | -         |
|  |                  | lafK | - | -          | -        | ASA_0353  | - | -         |

|  |  |      |   |   |   |          |   |   |
|--|--|------|---|---|---|----------|---|---|
|  |  | lafS | - | - | - | ASA_0384 | - | - |
|  |  | lafT | - | - | - | ASA_0385 | - | - |
|  |  | lafU | - | - | - | ASA_0386 | - | - |
|  |  | lafX | - | - | - | ASA_0381 | - | - |
|  |  | lfgA | - | - | - | ASA_0362 | - | - |
|  |  | lfgB | - | - | - | ASA_0363 | - | - |
|  |  | lfgF | - | - | - | ASA_0367 | - | - |
|  |  | lfgG | - | - | - | ASA_0368 | - | - |
|  |  | lfgH | - | - | - | ASA_0369 | - | - |
|  |  | lfgK | - | - | - | ASA_0372 | - | - |
|  |  | lfgL | - | - | - | ASA_0373 | - | - |
|  |  | lfgM | - | - | - | ASA_0361 | - | - |
|  |  | lfgN | - | - | - | ASA_0360 | - | - |
|  |  | lfhA | - | - | - | ASA_0352 | - | - |
|  |  | lfhB | - | - | - | ASA_0351 | - | - |
|  |  | lfiE | - | - | - | ASA_0354 | - | - |

|  |                                                   |       |             |            |          |          |   |           |
|--|---------------------------------------------------|-------|-------------|------------|----------|----------|---|-----------|
|  |                                                   | lfiH  | -           | -          | -        | ASA_0357 | - | -         |
|  |                                                   | lfiI  | -           | -          | -        | ASA_0358 | - | -         |
|  |                                                   | lfiJ  | -           | -          | -        | ASA_0359 | - | -         |
|  |                                                   | lfiM  | -           | -          | -        | ASA_0346 | - | -         |
|  |                                                   | lfiN  | -           | -          | -        | ASA_0347 | - | -         |
|  |                                                   | lfiQ  | -           | -          | -        | ASA_0349 | - | -         |
|  |                                                   | lfiR  | -           | -          | -        | ASA_0350 | - | -         |
|  |                                                   | maf-5 | -           | -          | -        | ASA_0374 | - | -         |
|  | Mannose-sensitive<br>hemagglutinin (Msh)<br>pilus | mshA  | R2X36_19750 | AHML_01955 | -        | -        | - | B565_3659 |
|  |                                                   | mshB  | R2X36_19755 | AHML_01950 | AHA_0395 | -        | - | B565_3660 |
|  |                                                   | mshC  | R2X36_19745 | AHML_01960 | AHA_0396 | -        | - | B565_3658 |
|  |                                                   | mshD  | R2X36_19740 | AHML_01965 | AHA_0397 | ASA_3941 | - | B565_3657 |
|  |                                                   | mshE  | R2X36_19770 | AHML_01935 | AHA_0392 | -        | - | B565_3663 |
|  |                                                   | mshF  | R2X36_19760 | AHML_01945 | AHA_0394 | -        | - | B565_3661 |
|  |                                                   | mshG  | R2X36_19765 | AHML_01940 | AHA_0393 | -        | - | B565_3662 |
|  |                                                   | mshI1 | R2X36_19800 | AHML_01905 | AHA_0387 | ASA_3946 | - | B565_3669 |

|  |                |              |              |            |          |          |   |           |
|--|----------------|--------------|--------------|------------|----------|----------|---|-----------|
|  |                | mshI         | R2X36_19805  | AHML_01900 | AHA_0385 | ASA_3947 | - | B565_3670 |
|  |                | mshJ         | R2X36_19795  | AHML_01910 | AHA_0388 | ASA_3945 | - | B565_3668 |
|  |                | mshK         | R2X36_19790  | AHML_01915 | -        | ASA_3944 | - | B565_3667 |
|  |                | mshL         | R2X36_19785  | AHML_01920 | AHA_0389 | ASA_3943 | - | B565_3666 |
|  |                | mshM         | R2X36_19780  | AHML_01925 | AHA_0390 | ASA_3942 | - | B565_3665 |
|  |                | mshN         | R2X36_19775  | AHML_01930 | AHA_0391 | -        | - | B565_3664 |
|  |                | mshO         | R2X36_19735  | AHML_01970 | AHA_0398 | ASA_3940 | - | B565_3656 |
|  |                | mshP         | R2X36_19730  | AHML_01975 | -        | ASA_3939 | - | B565_3655 |
|  |                | mshQ         | R2X36_19725* | AHML_01980 | AHA_0399 | ASA_3938 | - | B565_3654 |
|  | Polar flagella | Undetermined | R2X36_06620  | AHML_07520 | AHA_1389 | ASA_1361 | - | B565_1123 |
|  |                | Undetermined | -            | -          | AHA_4177 | ASA_0151 | - | -         |
|  |                | cheA-2       | R2X36_06600  | AHML_07500 | AHA_1385 | ASA_1357 | - | B565_1119 |
|  |                | cheB-2       | R2X36_06605  | AHML_07505 | AHA_1386 | ASA_1358 | - | B565_1120 |
|  |                | cheR-3       | R2X36_07720  | AHML_15310 | AHA_2843 | ASA_1488 | - | B565_2607 |
|  |                | cheV         | R2X36_07715  | AHML_15315 | AHA_2844 | ASA_1487 | - | B565_2608 |
|  |                | cheW         | R2X36_06625  | AHML_07525 | AHA_1390 | ASA_1362 | - | B565_1124 |

|  |  |      |             |            |          |          |   |                         |
|--|--|------|-------------|------------|----------|----------|---|-------------------------|
|  |  | cheY | R2X36_06590 | AHML_07490 | AHA_1383 | ASA_1355 | - | B565_1117               |
|  |  | cheZ | R2X36_06595 | AHML_07495 | AHA_1384 | ASA_1356 | - | B565_1118               |
|  |  | flaA | R2X36_13385 | AHML_09350 | AHA_1698 | ASA_2662 | - | B565_1452               |
|  |  | flaB | R2X36_13380 | AHML_09365 | AHA_1699 | ASA_2661 | - | B565_1453;<br>B565_1454 |
|  |  | flaG | R2X36_13375 | AHML_09370 | AHA_1700 | ASA_2660 | - | -                       |
|  |  | flaH | R2X36_13370 | AHML_09375 | AHA_1701 | ASA_2659 | - | B565_1455               |
|  |  | flaJ | R2X36_13365 | AHML_09380 | AHA_1702 | ASA_2658 | - | B565_1456               |
|  |  | flgA | R2X36_07710 | AHML_15320 | AHA_2845 | ASA_1486 | - | B565_2609               |
|  |  | flgB | R2X36_07725 | AHML_15305 | AHA_2842 | ASA_1489 | - | B565_2606               |
|  |  | flgC | R2X36_07730 | AHML_15300 | AHA_2841 | ASA_1490 | - | B565_2605               |
|  |  | flgD | R2X36_07735 | AHML_15295 | AHA_2840 | ASA_1491 | - | B565_2604               |
|  |  | flgE | R2X36_07740 | AHML_15290 | AHA_2839 | ASA_1492 | - | B565_2603               |
|  |  | flgF | R2X36_07745 | AHML_15285 | AHA_2838 | ASA_1493 | - | B565_2602               |
|  |  | flgG | R2X36_07750 | AHML_15280 | AHA_2837 | ASA_1494 | - | B565_2601               |
|  |  | flgH | R2X36_07755 | AHML_15275 | AHA_2836 | ASA_1495 | - | B565_2600               |

|  |  |      |             |            |          |           |   |           |
|--|--|------|-------------|------------|----------|-----------|---|-----------|
|  |  | flgI | R2X36_07760 | AHML_15270 | AHA_2835 | ASA_1496  | - | B565_2599 |
|  |  | flgJ | R2X36_07765 | AHML_15265 | AHA_2834 | ASA_1497  | - | B565_2598 |
|  |  | flgK | R2X36_07770 | AHML_15260 | AHA_2833 | ASA_1498  | - | B565_2597 |
|  |  | flgL | R2X36_07775 | AHML_15255 | AHA_2832 | ASA_1499* | - | B565_2596 |
|  |  | flgM | R2X36_07705 | AHML_15325 | AHA_2846 | ASA_1485  | - | B565_2610 |
|  |  | flgN | R2X36_07700 | AHML_15330 | AHA_2847 | ASA_1484  | - | B565_2611 |
|  |  | flhA | R2X36_06570 | AHML_07470 | AHA_1379 | ASA_1351  | - | B565_1113 |
|  |  | flhB | R2X36_06565 | AHML_07465 | AHA_1378 | ASA_1350  | - | B565_1112 |
|  |  | flhF | R2X36_06575 | AHML_07475 | AHA_1380 | ASA_1352  | - | B565_1114 |
|  |  | flhG | R2X36_06580 | AHML_07480 | AHA_1381 | ASA_1353  | - | B565_1115 |
|  |  | fliA | R2X36_06585 | AHML_07485 | AHA_1382 | ASA_1354  | - | B565_1116 |
|  |  | fliE | R2X36_06495 | AHML_07395 | AHA_1364 | ASA_1336  | - | B565_1098 |
|  |  | fliF | R2X36_06500 | AHML_07400 | AHA_1365 | ASA_1337  | - | B565_1099 |
|  |  | fliG | R2X36_06505 | AHML_07405 | AHA_1366 | ASA_1338  | - | B565_1100 |
|  |  | fliH | R2X36_06510 | AHML_07410 | AHA_1367 | ASA_1339  | - | B565_1101 |
|  |  | fliI | R2X36_06515 | AHML_07415 | AHA_1368 | ASA_1340  | - | B565_1102 |



|  |  |       |             |            |          |           |   |           |
|--|--|-------|-------------|------------|----------|-----------|---|-----------|
|  |  | fliJ  | R2X36_06520 | AHML_07420 | AHA_1369 | ASA_1341  | - | B565_1103 |
|  |  | fliK  | R2X36_06525 | AHML_07425 | AHA_1370 | ASA_1342  | - | B565_1104 |
|  |  | fliL  | R2X36_06530 | AHML_07430 | AHA_1371 | ASA_1343  | - | B565_1105 |
|  |  | fliM  | R2X36_06535 | AHML_07435 | AHA_1372 | ASA_1344  | - | B565_1106 |
|  |  | fliN  | R2X36_06540 | AHML_07440 | AHA_1373 | ASA_1345  | - | B565_1107 |
|  |  | fliO  | R2X36_06545 | AHML_07445 | AHA_1374 | ASA_1346  | - | B565_1108 |
|  |  | fliP  | R2X36_06550 | AHML_07450 | AHA_1375 | ASA_1347  | - | B565_1109 |
|  |  | fliQ  | R2X36_06555 | AHML_07455 | AHA_1376 | ASA_1348  | - | B565_1110 |
|  |  | fliR  | R2X36_06560 | AHML_07460 | AHA_1377 | ASA_1349  | - | B565_1111 |
|  |  | flmD  | -           | AHML_09415 | AHA_4179 | ASA_0149  | - | -         |
|  |  | flmH  | -           | AHML_11680 | AHA_4175 | ASA_0153  | - | -         |
|  |  | fliA  | R2X36_07805 | AHML_15225 | AHA_2826 | ASA_1505* | - | B565_2590 |
|  |  | fliB  | R2X36_07810 | AHML_15220 | AHA_2825 | ASA_1506  | - | B565_2589 |
|  |  | fliC  | R2X36_07815 | AHML_15215 | AHA_2824 | ASA_1507  | - | B565_2588 |
|  |  | maf-1 | R2X36_13355 | -          | AHA_1703 | -         | - | B565_1458 |
|  |  | maf-2 | -           | -          | AHA_4181 | ASA_0147  | - | -         |

|  |                  |       |                             |            |          |           |   |           |
|--|------------------|-------|-----------------------------|------------|----------|-----------|---|-----------|
|  |                  | motX  | R2X36_03000                 | AHML_03390 | AHA_0660 | ASA_0660  | - | B565_3496 |
|  |                  | motY  | R2X36_08910                 | AHML_14015 | AHA_2642 | ASA_2493  | - | -         |
|  |                  | nueA  | -                           | AHML_14845 | AHA_4178 | ASA_0150  | - | -         |
|  |                  | nueB  | -                           | AHML_09410 | AHA_4180 | ASA_0148  | - | -         |
|  |                  | pomA2 | R2X36_05420                 | AHML_17725 | AHA_3318 | ASA_0993  | - | B565_3201 |
|  |                  | pomA  | R2X36_06610                 | AHML_07510 | AHA_1387 | ASA_1359  | - | B565_1121 |
|  |                  | pomB2 | R2X36_05425;<br>R2X36_09275 | AHML_17720 | AHA_3317 | ASA_1737  | - | B565_3200 |
|  |                  | pomB  | R2X36_06615                 | AHML_07515 | AHA_1388 | ASA_1360  | - | B565_1122 |
|  | Tap type IV pili | tapA  | R2X36_19010                 | AHML_20500 | AHA_3868 | ASA_0414  | - | -         |
|  |                  | tapB  | R2X36_19015                 | AHML_20505 | AHA_3869 | ASA_0413  | - | B565_0359 |
|  |                  | tapC  | R2X36_19020                 | AHML_20510 | AHA_3870 | ASA_0412* | - | B565_0358 |
|  |                  | tapD  | R2X36_19025                 | AHML_20515 | AHA_3871 | ASA_0411  | - | B565_0357 |
|  |                  | tapF  | R2X36_09160                 | AHML_09695 | AHA_1757 | ASA_2601* | - | B565_2370 |
|  |                  | tapM  | R2X36_06010                 | AHML_17120 | AHA_3194 | ASA_1120  | - | B565_0964 |
|  |                  | tapN  | R2X36_06015                 | AHML_17115 | AHA_3193 | ASA_1121  | - | B565_0965 |
|  |                  | tapO  | R2X36_06020                 | AHML_17110 | AHA_3192 | ASA_1122  | - | B565_0966 |

|  |                 |       |             |            |          |          |   |           |
|--|-----------------|-------|-------------|------------|----------|----------|---|-----------|
|  |                 | tapP  | R2X36_06025 | AHML_17105 | AHA_3191 | ASA_1123 | - | B565_0967 |
|  |                 | tapQ  | R2X36_06030 | AHML_17100 | AHA_3190 | ASA_1124 | - | B565_0968 |
|  |                 | tapT  | R2X36_02855 | AHML_19295 | AHA_3665 | ASA_3632 | - | B565_3513 |
|  |                 | tapU  | R2X36_02850 | AHML_19300 | AHA_3666 | ASA_3633 | - | B565_3512 |
|  |                 | tapV  | R2X36_08575 | AHML_14210 | AHA_2681 | ASA_2532 | - | B565_1560 |
|  |                 | tapW  | R2X36_08235 | AHML_14530 | AHA_2739 | ASA_1634 | - | B565_1398 |
|  |                 | tapY1 | -           | AHML_03545 | AHA_0690 | ASA_0692 | - | B565_3465 |
|  |                 | tapY2 | -           | -          | -        | -        | - | B565_3464 |
|  |                 | tppA  | -           | AHML_03550 | AHA_0691 | ASA_0688 | - | B565_3469 |
|  |                 | tppB  | -           | AHML_03530 | AHA_0687 | ASA_0689 | - | B565_3468 |
|  |                 | tppC  | -           | -          | -        | ASA_0690 | - | B565_3467 |
|  |                 | tppD  | -           | -          | -        | ASA_0691 | - | B565_3466 |
|  |                 | tppE  | -           | AHML_03525 | AHA_0686 | ASA_0693 | - | B565_3462 |
|  |                 | tppF  | R2X36_02665 | AHML_19440 | AHA_3693 | ASA_3659 | - | B565_3457 |
|  | Type I fimbriae | fimA  | -           | AHML_02665 | AHA_0519 | ASA_3725 | - | B565_0475 |
|  |                 | fimC  | -           | AHML_02675 | AHA_0521 | ASA_3727 | - | B565_0477 |

|                  |                                            |      |                             |            |          |          |   |           |
|------------------|--------------------------------------------|------|-----------------------------|------------|----------|----------|---|-----------|
|                  |                                            | fimD | -                           | AHML_02680 | AHA_0522 | ASA_3728 | - | B565_0478 |
|                  |                                            | fimE | -                           | AHML_02685 | AHA_0523 | ASA_3729 | - | B565_0479 |
|                  |                                            | fimF | -                           | AHML_02690 | AHA_0524 | ASA_3730 | - | B565_0480 |
|                  | LPS O-antigen (P. aeruginosa)(Pseudomonas) |      | R2X36_07480;<br>R2X36_07510 | -          | -        | -        | - | -         |
| Secretion system | T2SS                                       | exeA | R2X36_18525                 | AHML_20105 | AHA_3785 | ASA_0515 | - | B565_2887 |
|                  |                                            | exeB | R2X36_18530                 | AHML_20110 | AHA_3786 | ASA_0514 | - | B565_2888 |
|                  |                                            | exeC | R2X36_18465                 | AHML_02905 | AHA_0568 | ASA_3774 | - | B565_2889 |
|                  |                                            | exeD | R2X36_18460                 | AHML_02910 | AHA_0569 | ASA_3775 | - | B565_2890 |
|                  |                                            | exeE | R2X36_18455                 | AHML_02915 | AHA_0570 | ASA_3776 | - | B565_2891 |
|                  |                                            | exeF | R2X36_18450                 | AHML_02920 | AHA_0571 | ASA_3777 | - | B565_2892 |
|                  |                                            | exeG | R2X36_18445                 | AHML_02925 | AHA_0572 | ASA_3778 | - | B565_2893 |
|                  |                                            | exeH | R2X36_18440                 | AHML_02935 | AHA_0573 | ASA_3779 | - | B565_2894 |
|                  |                                            | exeI | R2X36_18435                 | AHML_02940 | AHA_0574 | ASA_3780 | - | B565_2895 |
|                  |                                            | exeJ | R2X36_18430                 | AHML_02945 | AHA_0575 | ASA_3781 | - | B565_2896 |

|  |      |      |              |            |          |          |            |           |
|--|------|------|--------------|------------|----------|----------|------------|-----------|
|  |      | exeK | R2X36_18415  | AHML_02950 | AHA_0576 | ASA_3782 | -          | B565_2897 |
|  |      | exeL | R2X36_18410  | AHML_02955 | AHA_0577 | ASA_3783 | -          | B565_2898 |
|  |      | exeM | R2X36_18405  | AHML_02960 | AHA_0578 | ASA_3784 | -          | B565_2899 |
|  |      | exeN | R2X36_18400  | AHML_02965 | AHA_0579 | ASA_3785 | -          | B565_2900 |
|  |      | tapD | R2X36_19025* | AHML_20515 | AHA_3871 | ASA_0411 | -          | B565_0357 |
|  | T3SS | acr1 | -            | -          | -        | -        | ASA_P5G074 | -         |
|  |      | acr2 | -            | -          | -        | -        | ASA_P5G073 | -         |
|  |      | acrG | -            | -          | -        | -        | ASA_P5G068 | -         |
|  |      | acrH | -            | -          | -        | -        | ASA_P5G066 | -         |
|  |      | acrR | -            | -          | -        | -        | ASA_P5G069 | -         |
|  |      | acrV | -            | -          | -        | -        | ASA_P5G067 | -         |
|  |      | aexT | -            | -          | -        | ASA_4266 | -          | -         |
|  |      | aopB | -            | -          | -        | -        | ASA_P5G065 | -         |
|  |      | aopD | -            | -          | -        | -        | ASA_P5G064 | -         |
|  |      | aopH | -            | -          | -        | -        | ASA_P5G009 | -         |
|  |      | aopN | -            | -          | -        | -        | ASA_P5G075 | -         |

|  |  |      |   |   |   |   |             |   |
|--|--|------|---|---|---|---|-------------|---|
|  |  | aopO | - | - | - | - | ASA_P5G098  | - |
|  |  | aopX | - | - | - | - | ASA_P5G084* | - |
|  |  | ascB | - | - | - | - | ASA_P5G058  | - |
|  |  | ascC | - | - | - | - | ASA_P5G057  | - |
|  |  | ascD | - | - | - | - | ASA_P5G056  | - |
|  |  | ascE | - | - | - | - | ASA_P5G055  | - |
|  |  | ascF | - | - | - | - | ASA_P5G054  | - |
|  |  | ascG | - | - | - | - | ASA_P5G053  | - |
|  |  | ascH | - | - | - | - | ASA_P5G052  | - |
|  |  | ascI | - | - | - | - | ASA_P5G051  | - |
|  |  | ascJ | - | - | - | - | ASA_P5G050  | - |
|  |  | ascK | - | - | - | - | ASA_P5G049  | - |
|  |  | ascL | - | - | - | - | ASA_P5G048  | - |
|  |  | ascN | - | - | - | - | ASA_P5G076  | - |
|  |  | ascO | - | - | - | - | ASA_P5G077  | - |
|  |  | ascP | - | - | - | - | ASA_P5G078  | - |

|  |  |      |   |   |   |   |            |   |
|--|--|------|---|---|---|---|------------|---|
|  |  | ascQ | - | - | - | - | ASA_P5G079 | - |
|  |  | ascR | - | - | - | - | ASA_P5G080 | - |
|  |  | ascS | - | - | - | - | ASA_P5G081 | - |
|  |  | ascT | - | - | - | - | ASA_P5G082 | - |
|  |  | ascU | - | - | - | - | ASA_P5G083 | - |
|  |  | ascV | - | - | - | - | ASA_P5G070 | - |
|  |  | ascX | - | - | - | - | ASA_P5G072 | - |
|  |  | ascY | - | - | - | - | ASA_P5G071 | - |
|  |  | ati1 | - | - | - | - | ASA_P5G046 | - |
|  |  | ati2 | - | - | - | - | ASA_P5G045 | - |
|  |  | exsA | - | - | - | - | ASA_P5G060 | - |
|  |  | exsB | - | - | - | - | ASA_P5G061 | - |
|  |  | exsC | - | - | - | - | ASA_P5G063 | - |
|  |  | exsD | - | - | - | - | ASA_P5G059 | - |
|  |  | exsE | - | - | - | - | ASA_P5G062 | - |
|  |  | sycH | - | - | - | - | ASA_P5G008 | - |

|  |      |              |             |   |          |          |            |   |
|--|------|--------------|-------------|---|----------|----------|------------|---|
|  |      | sycO         | -           | - | -        | -        | ASA_P5G097 | - |
|  |      | sycX         | -           | - | -        | -        | ASA_P5G085 | - |
|  | T6SS | Undetermined | R2X36_12695 | - | AHA_1847 | ASA_2456 | -          | - |
|  |      | atsA         | R2X36_12790 | - | AHA_1828 | -        | -          | - |
|  |      | atsB         | R2X36_12785 | - | AHA_1829 | -        | -          | - |
|  |      | atsC         | R2X36_12780 | - | AHA_1830 | -        | -          | - |
|  |      | atsD         | R2X36_12775 | - | AHA_1831 | ASA_0454 | -          | - |
|  |      | atsG         | R2X36_12760 | - | AHA_1834 | ASA_2468 | -          | - |
|  |      | atsH         | R2X36_12755 | - | AHA_1835 | ASA_2467 | -          | - |
|  |      | atsI         | R2X36_12750 | - | AHA_1836 | ASA_2466 | -          | - |
|  |      | atsJ         | R2X36_12745 | - | AHA_1837 | ASA_2465 | -          | - |
|  |      | atsK         | R2X36_12740 | - | AHA_1838 | ASA_2464 | -          | - |
|  |      | atsL         | R2X36_12735 | - | AHA_1839 | ASA_2463 | -          | - |
|  |      | atsP         | R2X36_12715 | - | AHA_1843 | ASA_2459 | -          | - |
|  |      | atsQ         | R2X36_12710 | - | AHA_1844 | -        | -          | - |
|  |      | atsS         | R2X36_12700 | - | AHA_1846 | ASA_2457 | -          | - |



|       |                                                |           |             |            |          |          |   |           |
|-------|------------------------------------------------|-----------|-------------|------------|----------|----------|---|-----------|
|       |                                                | clpV1     | R2X36_12725 | -          | AHA_1841 | ASA_2461 | - | -         |
|       |                                                | dotU      | R2X36_12730 | -          | AHA_1840 | ASA_2462 | - | -         |
|       |                                                | hcp1      | R2X36_12805 | AHML_05970 | AHA_1118 | -        | - | -         |
|       |                                                | hcp       | R2X36_16020 | AHML_10025 | AHA_1826 | -        | - | -         |
|       |                                                | vasH      | R2X36_12720 | -          | AHA_1842 | ASA_2460 | - | -         |
|       |                                                | vasK/atsR | R2X36_12705 | -          | AHA_1845 | -        | - | -         |
|       |                                                | vgrG1     | R2X36_16010 | AHML_05975 | AHA_1119 | -        | - | -         |
|       |                                                | vgrG2     | R2X36_12795 | AHML_10030 | AHA_1827 | -        | - | -         |
|       |                                                | vgrG3     | R2X36_12690 | -          | AHA_1848 | -        | - | -         |
|       |                                                | vipA      | R2X36_12770 | -          | AHA_1832 | ASA_2470 | - | -         |
|       |                                                | vipB      | R2X36_12765 | -          | AHA_1833 | -        | - | -         |
| Toxin | Aerolysin<br>AerA/Cytotoxic<br>enterotoxin Act | aerA/act  | -           | AHML_02265 | AHA_0438 | ASA_3906 | - | B565_3626 |
|       | Extracellular<br>hemolysin AHH1                | ahh1      | -           | AHML_08400 | AHA_1512 | ASA_2854 | - | -         |

|                    |                                   |              |             |            |          |          |   |           |
|--------------------|-----------------------------------|--------------|-------------|------------|----------|----------|---|-----------|
|                    | Heat-stable cytotoxic enterotoxin | ast          | -           | AHML_04100 | AHA_0804 | -        | - | -         |
|                    | Hemolysin HlyA                    | hlyA         | R2X36_07895 | AHML_15145 | AHA_2809 | ASA_1523 | - | B565_2574 |
|                    | Hemolysin III                     | Undetermined | R2X36_04325 | AHML_18530 | AHA_3493 | ASA_0824 | - | B565_0799 |
|                    | The repeat in toxin (RTX)         | rtxA         | -           | AHML_07370 | AHA_1359 | -        | - | -         |
|                    |                                   | rtxB         | -           | -          | AHA_1356 | -        | - | -         |
|                    |                                   | rtxC         | -           | -          | AHA_1358 | -        | - | -         |
|                    |                                   | rtxD         | -           | -          | AHA_1355 | -        | - | -         |
|                    |                                   | rtxE         | -           | -          | AHA_1354 | -        | - | -         |
|                    |                                   | rtxH         | -           | -          | AHA_1357 | -        | - | -         |
|                    | Thermostable hemolysin (TH)       | Undetermined | R2X36_05890 | AHML_17235 | AHA_3217 | ASA_1096 | - | B565_0938 |
| Antiphagocytosis   | Capsular polysaccharide(Vibrio)   | wbjD/wecB    | R2X36_13505 | -          | -        | -        | - | -         |
|                    |                                   | wecA         | R2X36_07560 | -          | -        | -        | - | -         |
|                    |                                   | wecC         | R2X36_13510 | -          | -        | -        | - | -         |
| Fimbrial adherence | Bcf(Salmonella)                   | bcfA         | R2X36_08640 | -          | -        | -        | - | -         |
|                    |                                   | bcfB         | R2X36_08645 | -          | -        | -        | - | -         |

| determinants         |                                                 |       |                                                                                                             |   |   |   |   |   |
|----------------------|-------------------------------------------------|-------|-------------------------------------------------------------------------------------------------------------|---|---|---|---|---|
| Glycosylation system | O-linked flagellar glycosylation(Campylobacter) | neuB2 | R2X36_07485                                                                                                 | - | - | - | - | - |
| Immune evasion       | Capsule(Acinetobacter)                          |       | R2X36_07470;<br>R2X36_07475;<br>R2X36_07495;<br>R2X36_07535;<br>R2X36_07540;<br>R2X36_07545;<br>R2X36_16675 | - | - | - | - | - |
|                      | Capsule(Streptococcus)                          | rmlA  | R2X36_07570                                                                                                 | - | - | - | - | - |
| Serum resistance     | LPS rfb locus(Klebsiella)                       | rmlD  | R2X36_07565                                                                                                 | - | - | - | - | - |
| Stress adaptation    | Catalase-peroxidase(Mycobacterium)              | katG  | R2X36_09500                                                                                                 | - | - | - | - | - |

Notes: -, negative

\* Identified by Blastn

Table saved from VFDB (<http://www.mgc.ac.cn/VFs/>) [Fri Nov 10 17:26:28 2023]
